# Supplementary material for: The necroptosis-inducing pseudokinase mixed lineage kinase domain-like regulates the adipogenic differentiation of pre-adipocytes
Source: PubMed Central journal article supplement — iScience. 2022 Sep 19;25(10):105166. doi: 10.1016/j.isci.2022.105166 (PMC9530846; doi:10.1016/j.isci.2022.105166), 2022-09-19
Supplement: mmc1.pdf [file mmc1.pdf]

**Supplemental information**

**The necroptosis-inducing pseudokinase  
mixed lineage kinase domain-like regulates  
the adipogenic differentiation of pre-adipocytes**

**Julie Magusto, Carine Beaupère, Marta B. Afonso, Martine Auclair, Jean-Louis Delaunay, Pierre-Antoine Soret, Gilles Courtois, Tounsia Aït-Slimane, Chantal Housset, Isabelle Jéru, Bruno Fève, Vlad Ratziu, Cecilia M.P. Rodrigues, and Jérémie Gautheron**

1 **Supplemental information**

2

3 **Supplementary Table 1. List of predicted off-target sequences of the CRISPR/Cas9**  
 4 **editing strategy, with mismatch position and genomic location, related to STAR Methods.**

5 The CRISPOR web tool (<http://crispor.tefor.net/>) is well recognized to predict the risk of off-  
 6 target sequences by providing a cutting frequency determination (CFD) specificity score  
 7 ranging from 1 to 100. The higher the number, the lower the risk of off-target effects. It is based  
 8 on the accurate CFD off-target model from Doench JG et al. (Nat Biotechnol 2016  
 9 Feb;34(2):184-196), which recommends guides with a CFD specificity score > 50. The gRNA  
 10 used herein to target *Mlkl* exon 1 has a CFD score of 96, *Ripk3* exon 1 a CFD score of 96 and  
 11 *MLKL* exon 4 a CFD score of 86. All gRNA did not match perfectly any other genomic region.  
 12 The table below provides a list of potential off-target sequences with up to three mismatches  
 13 with the different gRNA used. Notably, off-targets are considered if they are flanked by an  
 14 NGG motif, which corresponds to the PAM sequence allowing the Cas9 to cut DNA.

15

| Number of mismatches | Potential off-target sequences (mismatches are in red and bold characters) | Locus of the off-target (location, gene) |
|----------------------|----------------------------------------------------------------------------|------------------------------------------|
|                      | <b>GCACACGGTTTCCTAGACGC</b> ( <i>Mlkl</i> )                                |                                          |
| 3                    | GCACAC <b>CTTC</b> CCTAGACGC                                               | intergenic, <i>Gm25904-Cpne4</i>         |
|                      | <b>TGGTGCGTCAGCGGTTTCCTC</b> ( <i>Ripk3</i> )                              |                                          |
| 3                    | TGGTG <b>AGTCAGTAG</b> TTTCCTC                                             | intergenic, <i>Cntn5-Gm25365</i>         |
| 3                    | <b>TAGTAGACAGCGGTTTCCTC</b>                                                | intron, <i>Cog5</i>                      |
| 3                    | TGGT <b>CCTTCAGCGGTTCC</b> C                                               | intergenic, <i>Kcnq1</i>                 |
| 3                    | TGGTGCG <b>CCAGCTGTGC</b> CTC                                              | intron, <i>Galnt15</i>                   |
| 3                    | TGGT <b>TCGTCAGCGGTTCA</b> GC                                              | exon, <i>Sypl</i>                        |
| 2                    | TGGTG <b>GGTCAGCTGT</b> TCCTC                                              | intergenic, <i>Gm9824-9996/Soga3</i>     |
|                      | <b>AGTGAGGCAGACTTTCAATA</b> ( <i>MLKL</i> )                                |                                          |
| 3                    | AGTGAGG <b>GAGCC</b> TTCAATA                                               | intergenic, <i>CID</i>                   |
| 3                    | AGTGAT <b>GGAGACA</b> TTCAATA                                              | intergenic, <i>IGSF9B</i>                |
| 3                    | AGTG <b>TGGCAGACA</b> TT <b>AA</b> AATA                                    | intergenic, <i>PPAP2B</i>                |
| 3                    | AGT <b>TAGGTAGACCT</b> TTCAATA                                             | intergenic, <i>SNORA48</i>               |
| 3                    | AGTGAT <b>GCAGCA</b> TTTCAATA                                              | intergenic, <i>SNORA18</i>               |
| 3                    | AGTGAGG <b>CTGACA</b> TTCA <b>GT</b> A                                     | intron, <i>ERG</i>                       |
| 3                    | <b>TGTGAGGCAGAA</b> TTTCA <b>CTA</b>                                       | intergenic, <i>LINC00603</i>             |
| 3                    | <b>GGTGGGA</b> AGACTTTCAATA                                                | intergenic, <i>RP11-460H9.1</i>          |
| 3                    | AGT <b>CAGGCAGAA</b> TTT <b>CG</b> AATA                                    | intergenic, <i>RP11-447M12.3</i>         |
| 3                    | AGTGAGGCAGAC <b>ATCCAAA</b>                                                | intergenic, <i>SYT9</i>                  |
| 3                    | AGTGAGGCAG <b>TCTTACAACA</b>                                               | intergenic, <i>SNORD66</i>               |
| 3                    | AGTGAGGCAGATTTT <b>TAATC</b>                                               | intron, <i>ERC1</i>                      |
| 3                    | A <b>ATGAGGGAGACTTTCAATG</b>                                               | intron, <i>FAM154A</i>                   |
| 3                    | A <b>CTGAGGCAGACTTTCCATC</b>                                               | exon, <i>CASC2</i>                       |

|   |                                                |                                  |
|---|------------------------------------------------|----------------------------------|
| 3 | <b>T</b> GTG <b>G</b> GGCAG <b>C</b> TTTCAATA  | intron, <i>SNTB1</i>             |
| 3 | AGTGAGGCAGACT <b>C</b> TC <b>CC</b> A          | intergenic, <i>MBP</i>           |
| 3 | AG <b>A</b> GAGGC <b>A</b> ACTTT <b>C</b> CATA | intergenic, <i>RP11-807H17.1</i> |
| 3 | AGTGAGG <b>A</b> AGACT <b>G</b> <b>T</b> TAATA | intergenic, <i>IL6</i>           |
| 2 | AGTGAG <b>T</b> CAGACTTTCA <b>G</b> TA         | intergenic, <i>VRTN-SYNDIG1</i>  |
| 2 | AGTGAGG <b>A</b> AGACTTTCA <b>AA</b> A         | intron, <i>C6orf211</i>          |
| 1 | AGTGAGGCAG <b>A</b> TTTCAATA                   | intergenic, <i>ACO11288.2</i>    |

---

1

2

1 **Supplementary Table 2. The primer sequences used in this study were the following,**  
 2 **related to STAR Methods.**

3

| <i>mRNA</i>   | <i>Sense primer</i>           | <i>Antisense primer</i>        |
|---------------|-------------------------------|--------------------------------|
| <i>Pparγ</i>  | 5'-GCCAGTTTCGATCCGTAGAA-3'    | 5'-ATTCCTTGGCCCTCTGAGAT-3'     |
| <i>C/ebpa</i> | 5'-AAACAACGCAACGTGGAGA-3'     | 5'-GCGGTCATTGTCACTGGTC-3'      |
| <i>Fasn</i>   | 5'-TTCCAAGACGAAAATGATGC-3'    | 5'-AATTGTGGGATCAGGAGAGC-3'     |
| <i>Scd1</i>   | 5'-CCGGAGACCCCTTAGATCGA-3'    | 5'-TAGCCTGTAAAAGATTTCTGCAAA-3' |
| <i>Fabp4</i>  | 5'-AAGGTGAAGAGCATCATAACCCT-3' | 5'-TCACGCCTTTCATAACACATTCC-3'  |
| <i>Wnt10b</i> | 5'-GTTAGGTGCGAGCAGAGCCAA-3'   | 5'-TGCTTAGAGCCCGACTGAAC-3'     |
| <i>Ucp-1</i>  | 5'-ACTGCCACACCTCCAGTCATT-3'   | 5'-CTTTGCCTCACTCAGGATTGG-3'    |
| <i>Pgc-1α</i> | 5'-TATGGAGTGACATAGAGTGTGCT-3' | 5'-CCACTTCAATCCACCCAGAAAAG-3'  |
| <i>Pgc-1β</i> | 5'-AGAAGGTTGGCTGACATGGG-3'    | 5'-AGGTCAAGCTCTGGCAAGTC-3'     |
| <i>Tnf-α</i>  | 5'-ATGAGCACAGAAAGCATGATC-3'   | 5'-TACAGGCTTGTCACTCGAATT-3'    |
| <i>Mcp-1</i>  | 5'-GCCTGCTGTTACAGTTGC-3'      | 5'-CAGGTGAGTGGGGCGTTA-3'       |
| <i>F4/80</i>  | 5'-TGAATGGCTCCATTTGTGAA-3'    | 5'-GGCCCTCCTCCACTAGATTC-3'     |
| <i>Hmbs</i>   | 5'-ATCTTGACCTAGTGAGTGTGT-3'   | 5'-GTACAGTTGCCCATCTTTCATCA-3'  |
| <i>Hprt</i>   | 5'-TCAGTCAACGGGGGACATAA-3'    | 5'-TGCTTAACCAGGGAAAGCAAA-3'    |

4

5

**A**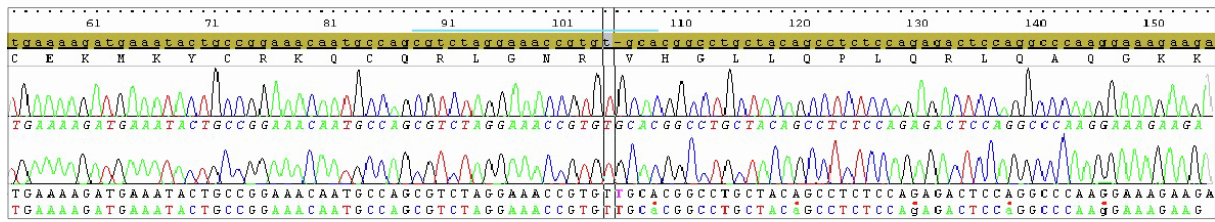**B**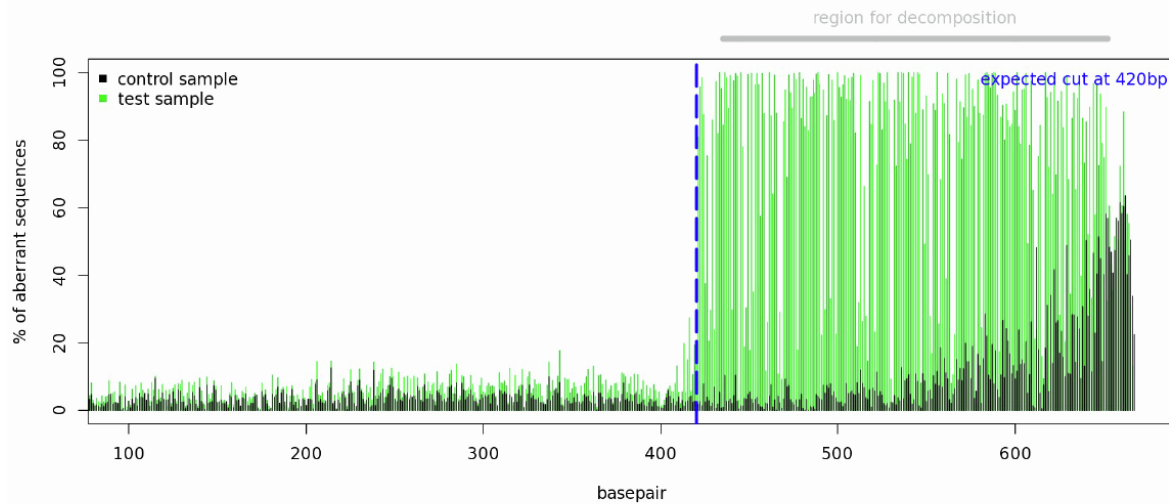**C**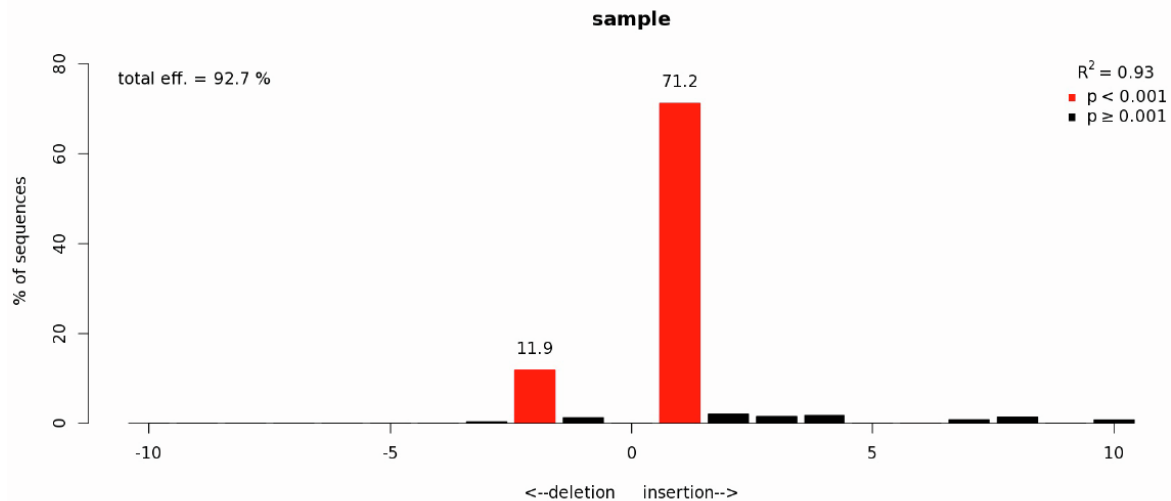

1

2 **Figure S1. Assessment of CRISPR/Cas9 editing efficiency with gRNA targeting *Mkl1* exon**  
 3 **1 in control and edited 3T3-L1, related to Figure 2. (A) Sanger sequencing of the target**  
 4 **region (exon 1) confirmed high level of recombination. The gRNA sequence is blue-underlined.**  
 5 **(B) Determination of CRISPR indel pattern in control and edited ASC by analyzing Sanger**  
 6 **sequencing data with the software Tide (<https://tide.nki.nl>).** The discordance plot details the  
 7 rate of sequence alignment per base between the control and edited samples in the inference  
 8 window (*i.e.*, the region around the recombination site highlighted by a vertical dotted blue line

1 and the gRNA sequence is blue-underlined). Before the gRNA target site, the green line (edited  
2 sample) and the dark-green line (control sample) are close together. After the gRNA target site,  
3 a jump is observed, corresponding to a high level of sequence misalignment. (C) The graph  
4 displays the frequency of indels in relationship with the indel size. The editing efficiency  
5 corresponding to the recombination rate was evaluated at 93%.

6

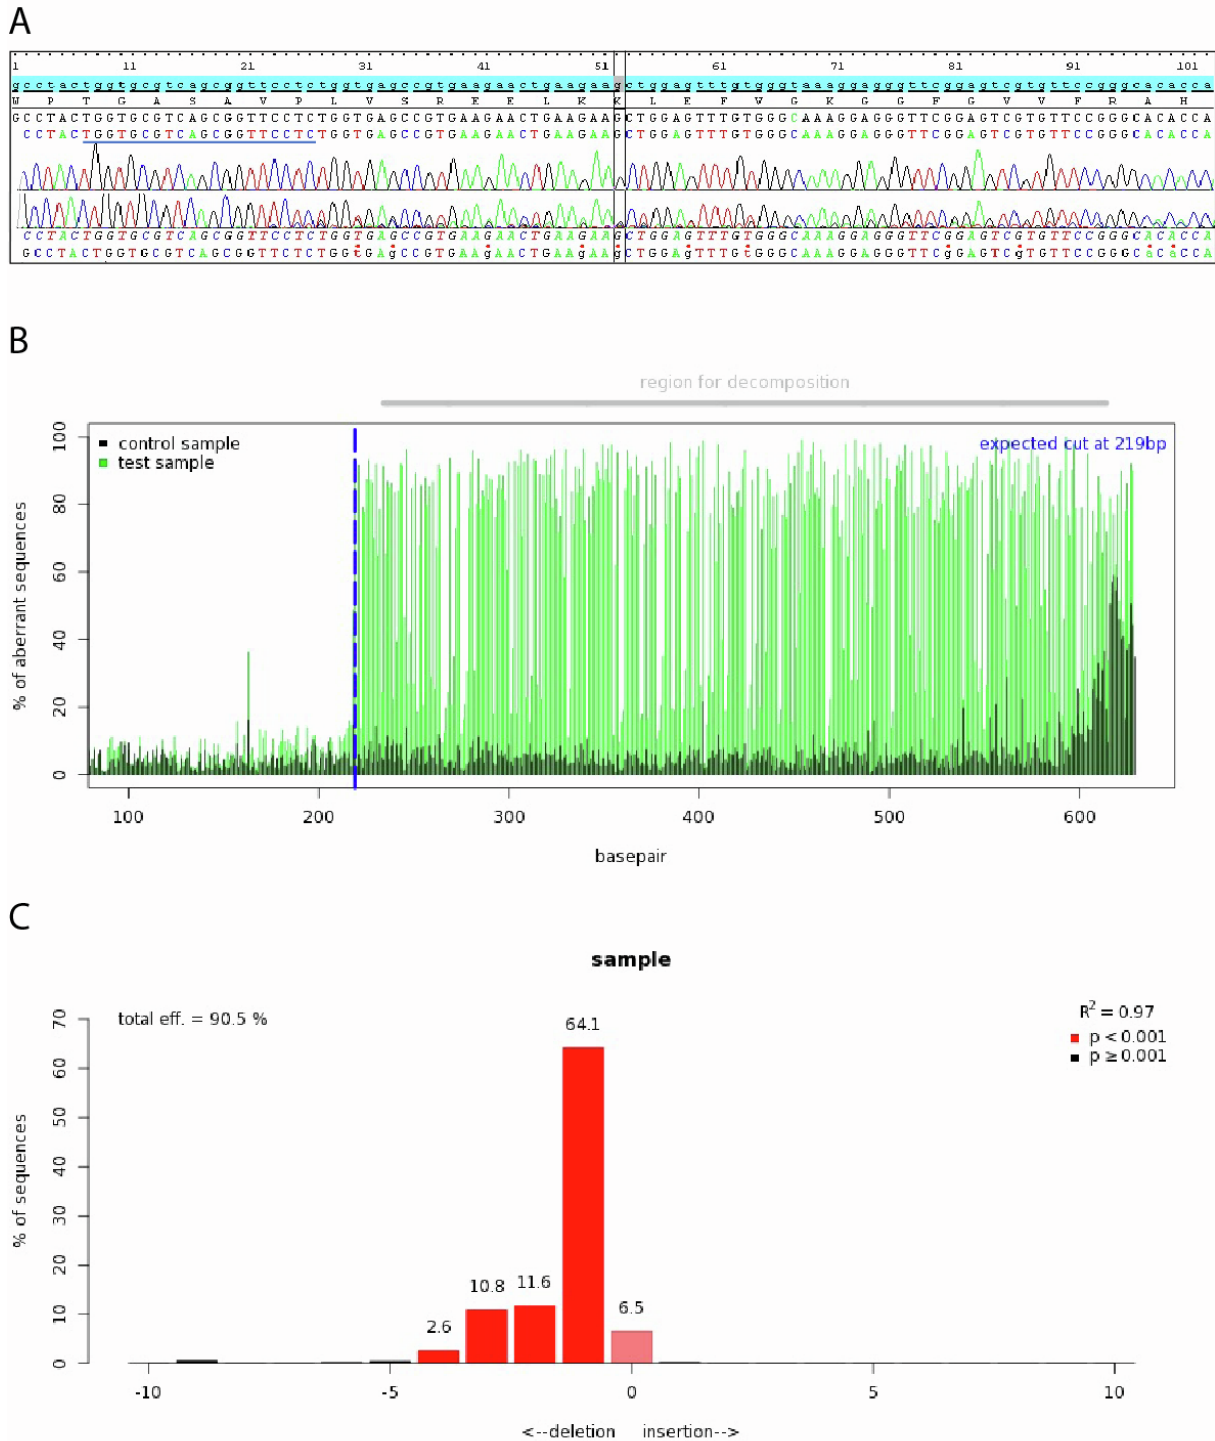

1  
 2 **Figure S2. Assessment of CRISPR/Cas9 editing efficiency with gRNA targeting *Ripk3***  
 3 **exon 1 in control and edited 3T3-L1, related to Figure 2. (A)** Sanger sequencing of the target  
 4 region (exon 1) confirmed high level of recombination. The gRNA sequence is blue-underlined.  
 5 **(B)** Determination of CRISPR indel pattern in control and edited ASC by analyzing Sanger  
 6 sequencing data with the software Tide (<https://tide.nki.nl>). The discordance plot details the  
 7 rate of sequence alignment per base between the control and edited samples in the inference  
 8 window (*i.e.*, the region around the recombination site highlighted by a vertical dotted blue line

1 and the gRNA sequence is blue-underlined). Before the gRNA target site, the green line (edited  
2 sample) and the dark-green line (control sample) are close together. After the gRNA target site,  
3 a jump is observed, corresponding to a high level of sequence misalignment. (C) The graph  
4 displays the frequency of indels in relationship with the indel size. The editing efficiency  
5 corresponding to the recombination rate was evaluated at 91%.



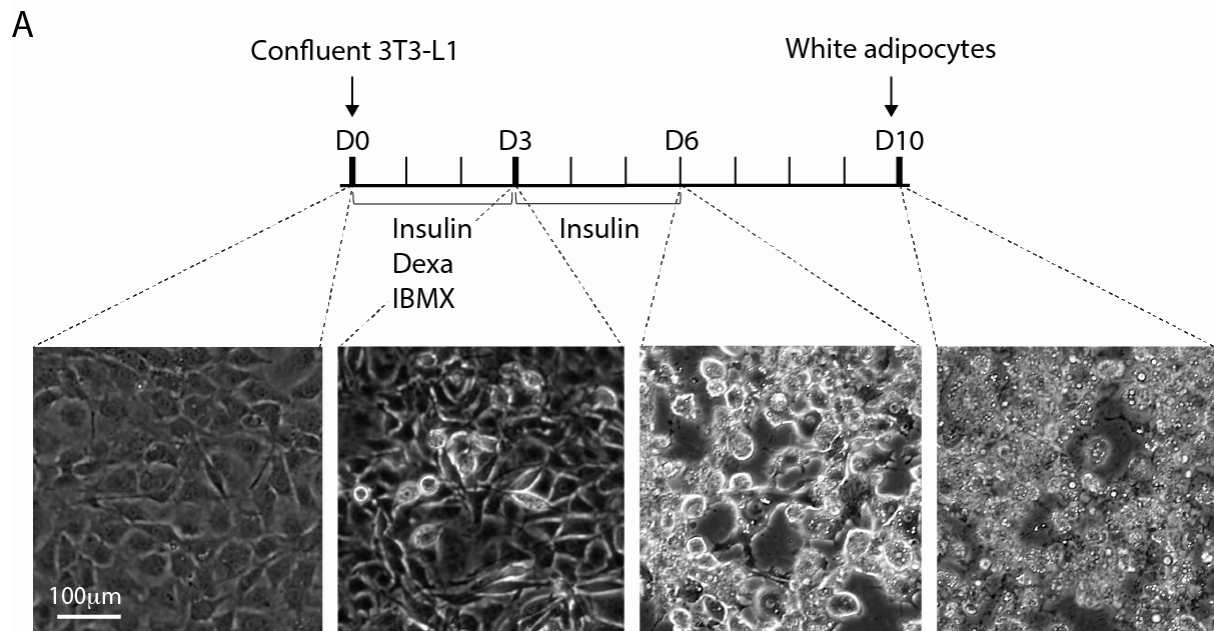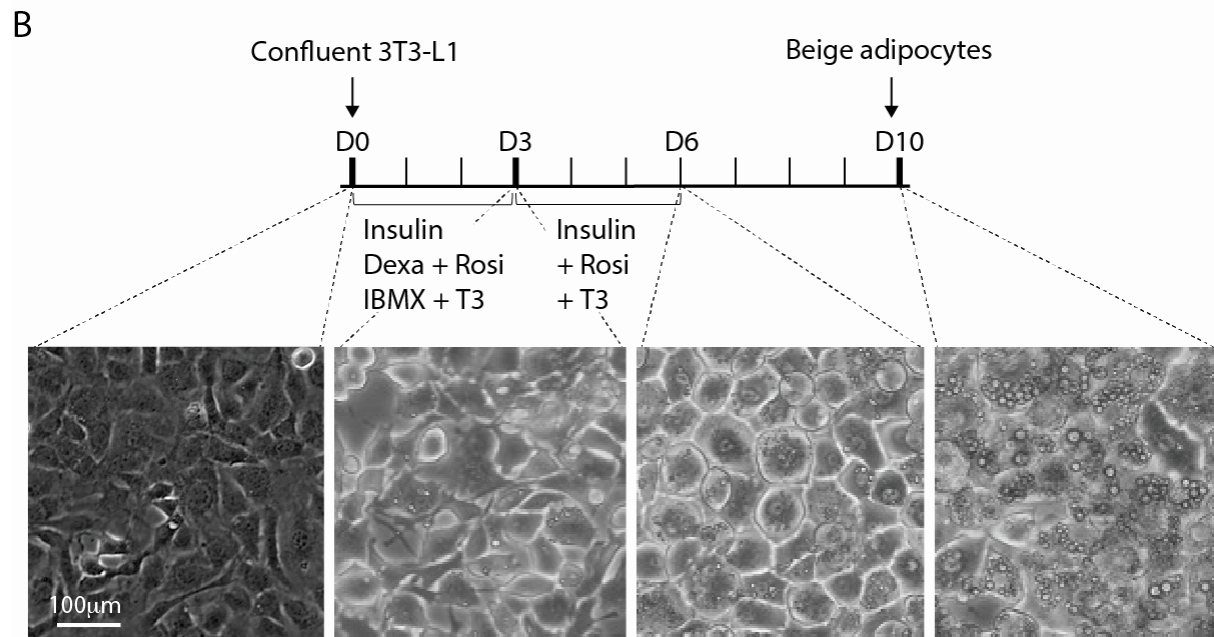

1  
2  
3  
4  
5  
6  
7  
8

**Figure S3. Timeline representation of the 3T3-L1 pre-adipocyte differentiation process using hormonal cocktails, related to Figure 3. (A) Protocol for white adipocyte differentiation. (B) Protocol for beige adipocyte differentiation. Dexa: dexamethasone; IBMX: 3-isobutyl-1-methylxanthine; Rosi: rosiglitazone; T3: triiodothyronine; D0–D10: Day 0 to Day 10.**

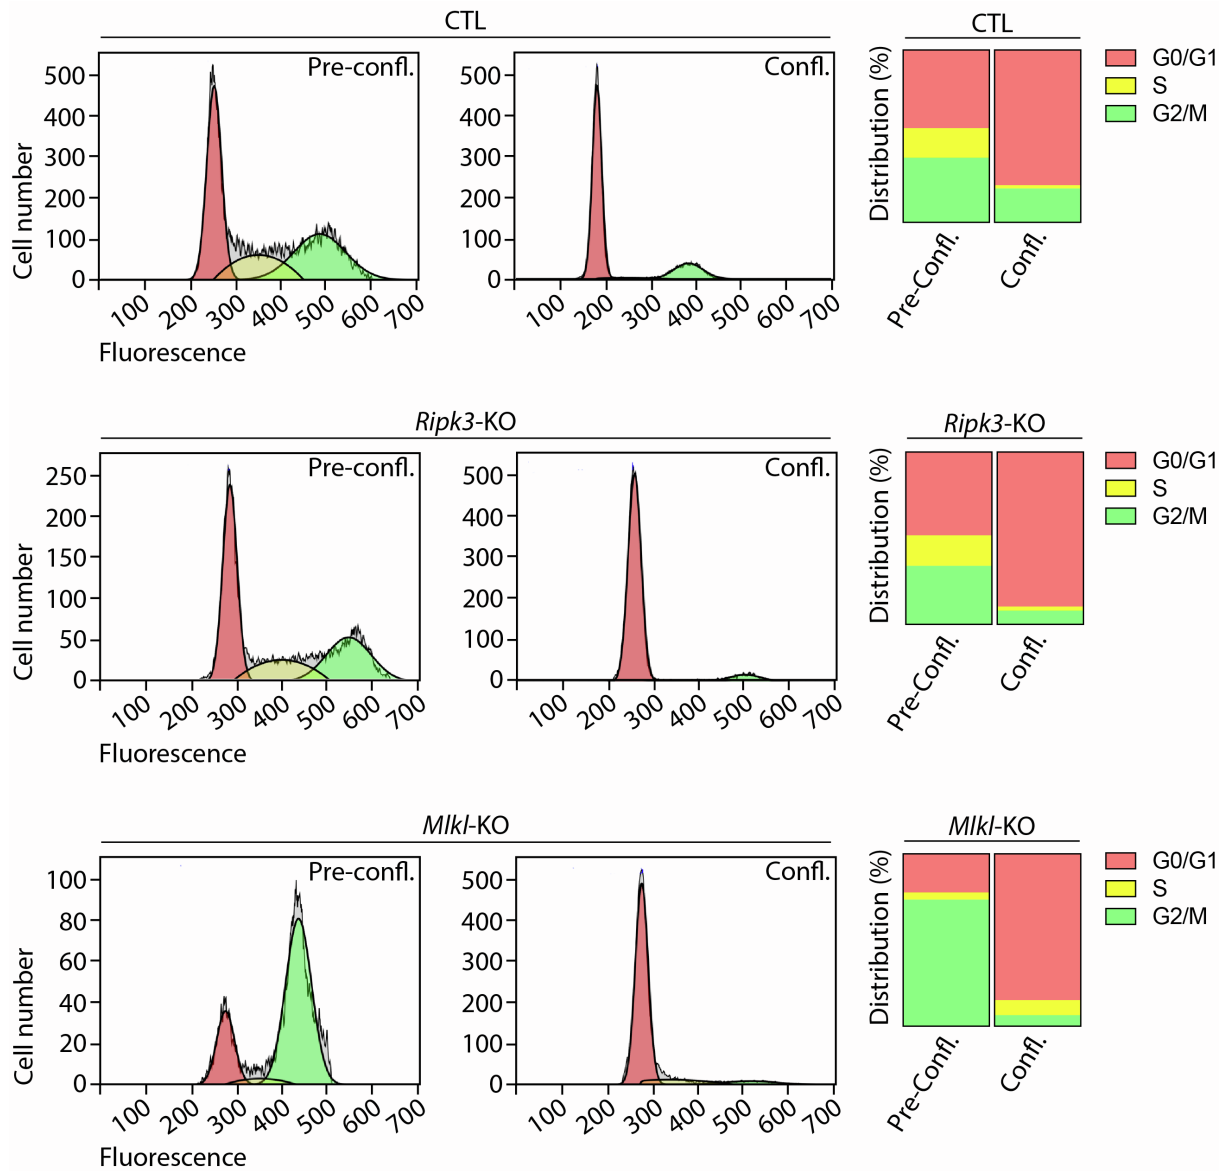

1  
2  
3  
4  
5  
6  
7  
8  
9

**Figure S4. Cell cycle arrest analysis of the 3T3-L1 cells, related to Figure 3.** Data were obtained in 3T3-L1 with a CRISPR-Cas9-mediated *Ripk3*- or *Mkl1*-knockout (KO), and 3T3-L1 transduced with a Cas9/scramble gRNA plasmid corresponding to control (CTL) cells. Flow cytometry using PI staining was used to determine the cell cycle distribution of pre-confluent and confluent 3T3-L1 cells. Pre-Confl.: pre-confluence; Confl.: confluence.

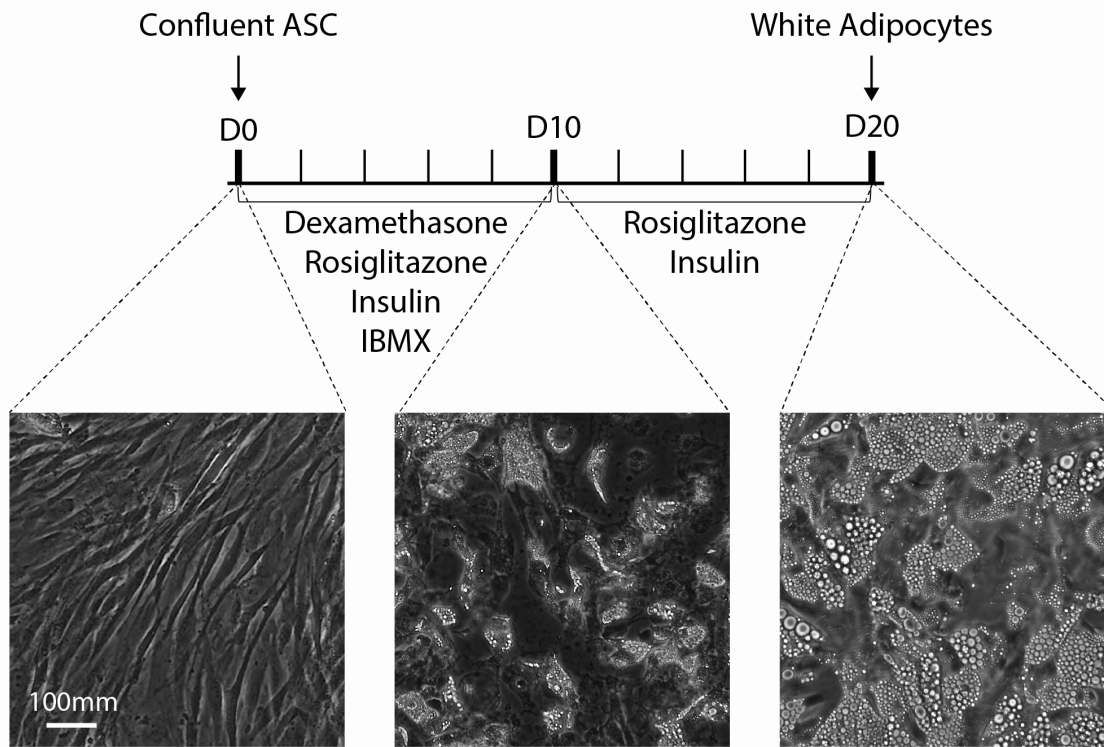

1  
2  
3  
4  
5  
6

**Figure S5. Timeline representation of the ASC differentiation process into white adipocytes using a hormonal cocktail, related to Figure 3.** ASC, human adipose stem cell; IBMX: 3-isobutyl-1-methylxanthine; D0: day 0; D10: day 10; D20: day 20.

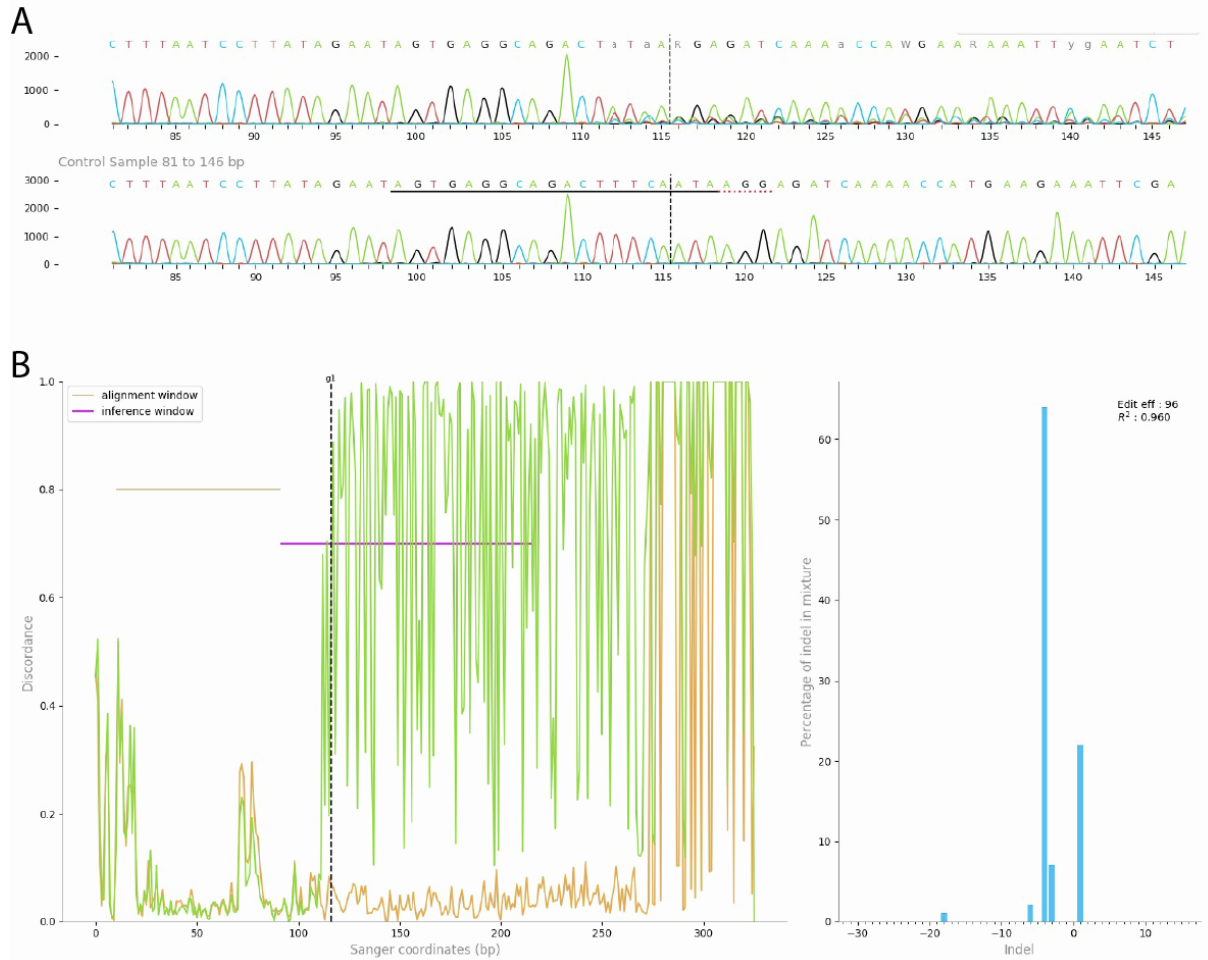

1  
2  
3  
4  
5  
6  
7  
8  
9  
10  
11  
12  
13  
14  
15

**Figure S6. Assessment of CRISPR/Cas9 editing efficiency with gRNA targeting *MLKL* exon 1 in control and edited ASC, related to Figure 3. (A)** Sanger sequencing of the target region (exon 4) confirmed high level of recombination. The expected break site is indicated by a vertical dotted line and the gRNA sequence is underlined. **(B)** Determination of CRISPR indel pattern in control and edited ASC by analyzing Sanger sequencing data with the Synthego software (<https://ice.synthego.com>). Left panel: The discordance plot details the rate of sequence alignment per base between the control and edited samples in the inference window (i.e., the region around the recombination site). Before the gRNA target site, the green line (edited sample) and the orange line (control sample) are close together. After the gRNA target site, a jump is observed, corresponding to a high level of sequence misalignment. Right panel: The graph displays the frequency of indels in relationship with the indel size. The editing efficiency corresponding to the recombination rate was evaluated at 96%.

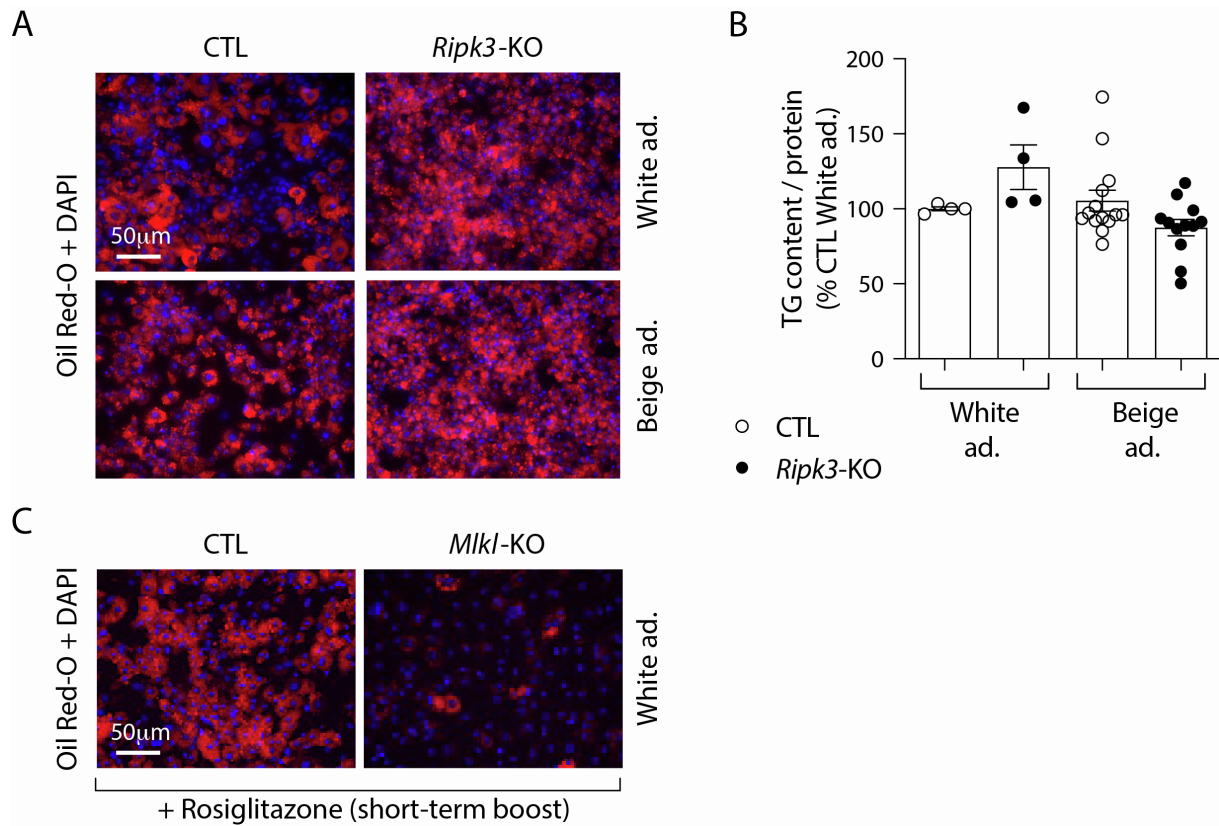

1  
2  
3  
4  
5  
6  
7  
8  
9  
10  
11  
12  
13  
14

**Figure S7. *Ripk3* deficiency does not alter the differentiation of 3T3-L1 into beige adipocytes, related to Figure 4.** Data were obtained in 3T3-L1 with a CRISPR-Cas9-mediated *Ripk3*- or *Mlkl*-knockout (KO), and 3T3-L1 transduced with a Cas9/scramble gRNA plasmid corresponding to control (CTL) cells. (A) 3T3-L1 adipocytes were assessed by Oil Red O (Red) and nuclei (DAPI, blue) at the final stage of differentiation (D10). Images are representative of three independent experiments. (B) Quantification of Oil Red O fluorescence normalized to DNA content (DAPI). Results are expressed as means  $\pm$  SEM of three independent experiments. (C) CTL and *Mlkl*-KO 3T3-L1 cells were differentiated into white adipocytes using a short-term boost of rosiglitazone between D0-D3 of the differentiation protocol (please also refer to the Supplementary Figure 4A).

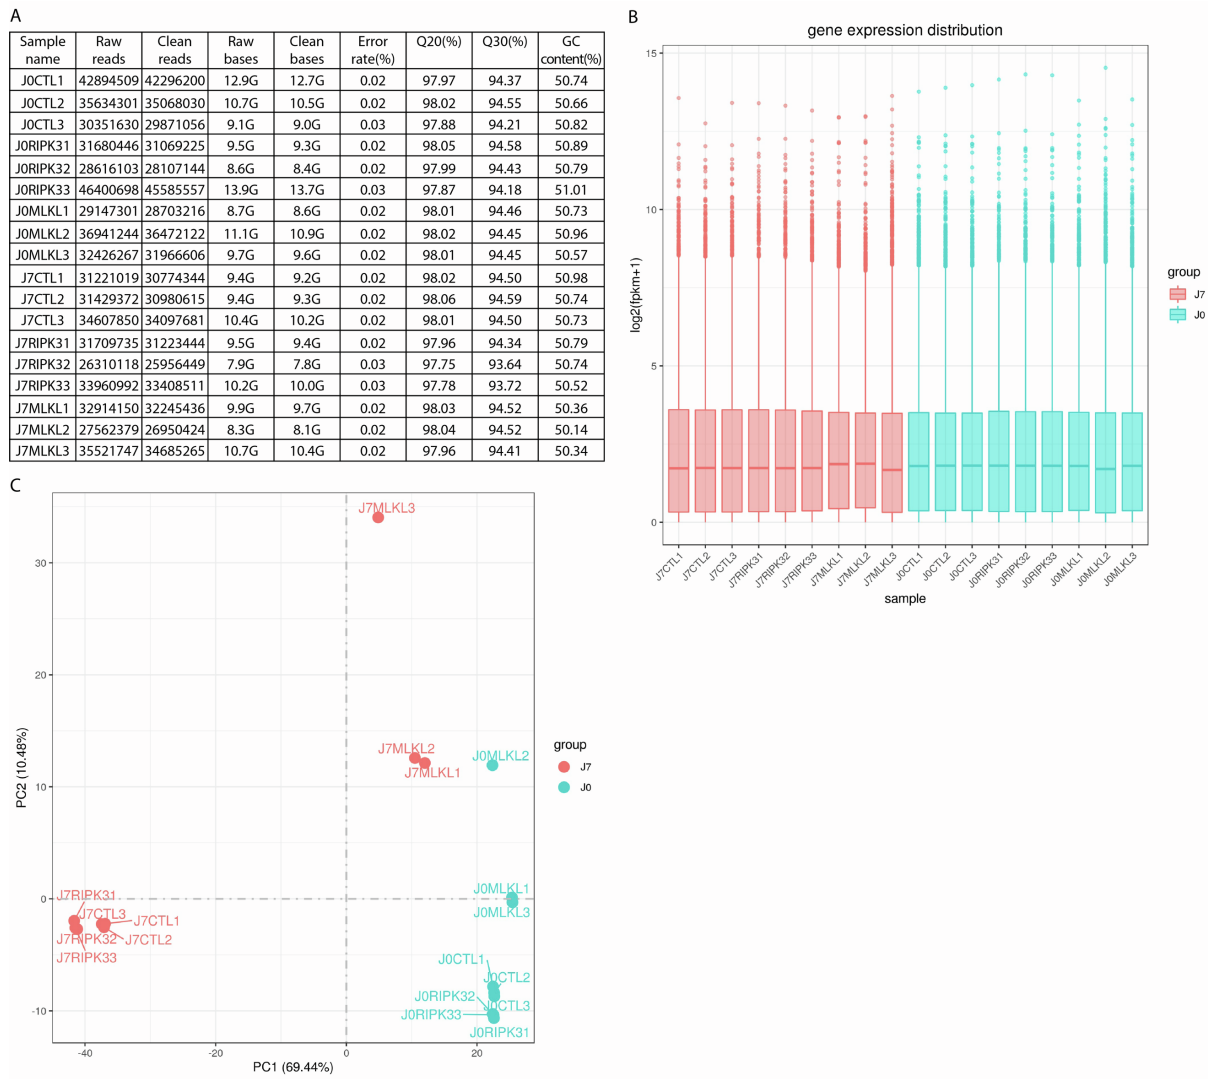

1  
2  
3  
4  
5  
6

**Figure S8. RNA sequencing quality control and reads processing, related to Figure 5. (A)** QC stats and number of clean reads for each replicate before alignment. **(B)** Gene expression distribution across samples **(C)** Principal component analysis in between replicates. J0 means Day 0 (basal stage) and J7 Day 7 (differentiated cells).

**A** D0 *Miki*-KO vs. D0 CTL (GO)

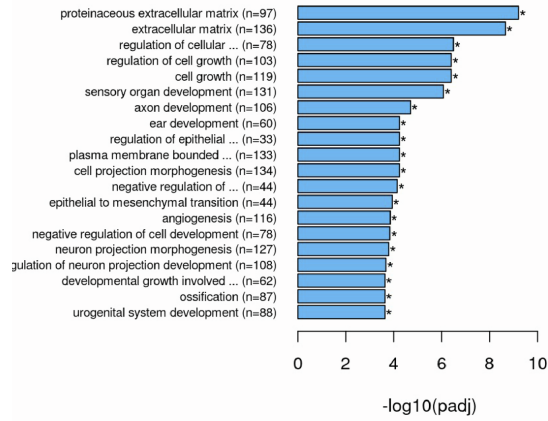

**B** GO 0001503: Ossification

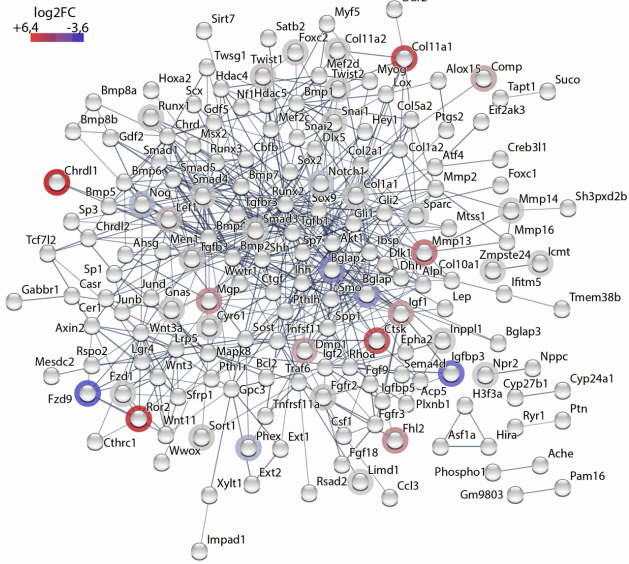

**C** D0 *Ripk3*-KO vs. D0 CTL (GO)

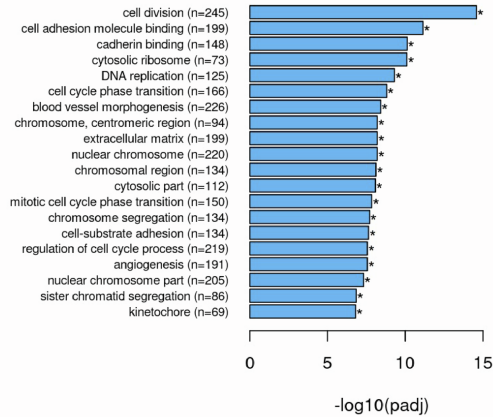

**D** WikiPathways WP413: G1 to S cell cycle control

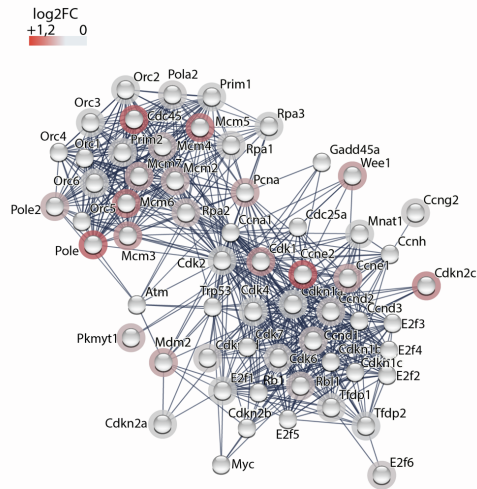

1 **Figure S9. Differential expressed genes enrichment analysis before differentiation, related**  
2 **to Figure 5. (A)** Gene ontology analysis for significantly changed DEGs in *Mkl*-KO vs CTL  
3 cells at D0. **(B)** Protein interaction network in *Mkl*-KO vs CTL cells for GO 0001503:  
4 Ossification generated using STRING-db. **(C)** Gene ontology analysis for significantly changed  
5 DEGs in *Ripk3*-KO vs CTL cells at D0. **(D)** Protein interaction network in *Ripk3*-KO vs CTL  
6 cells for WP413: G1 to S cell cycle control using STRING-db.

7



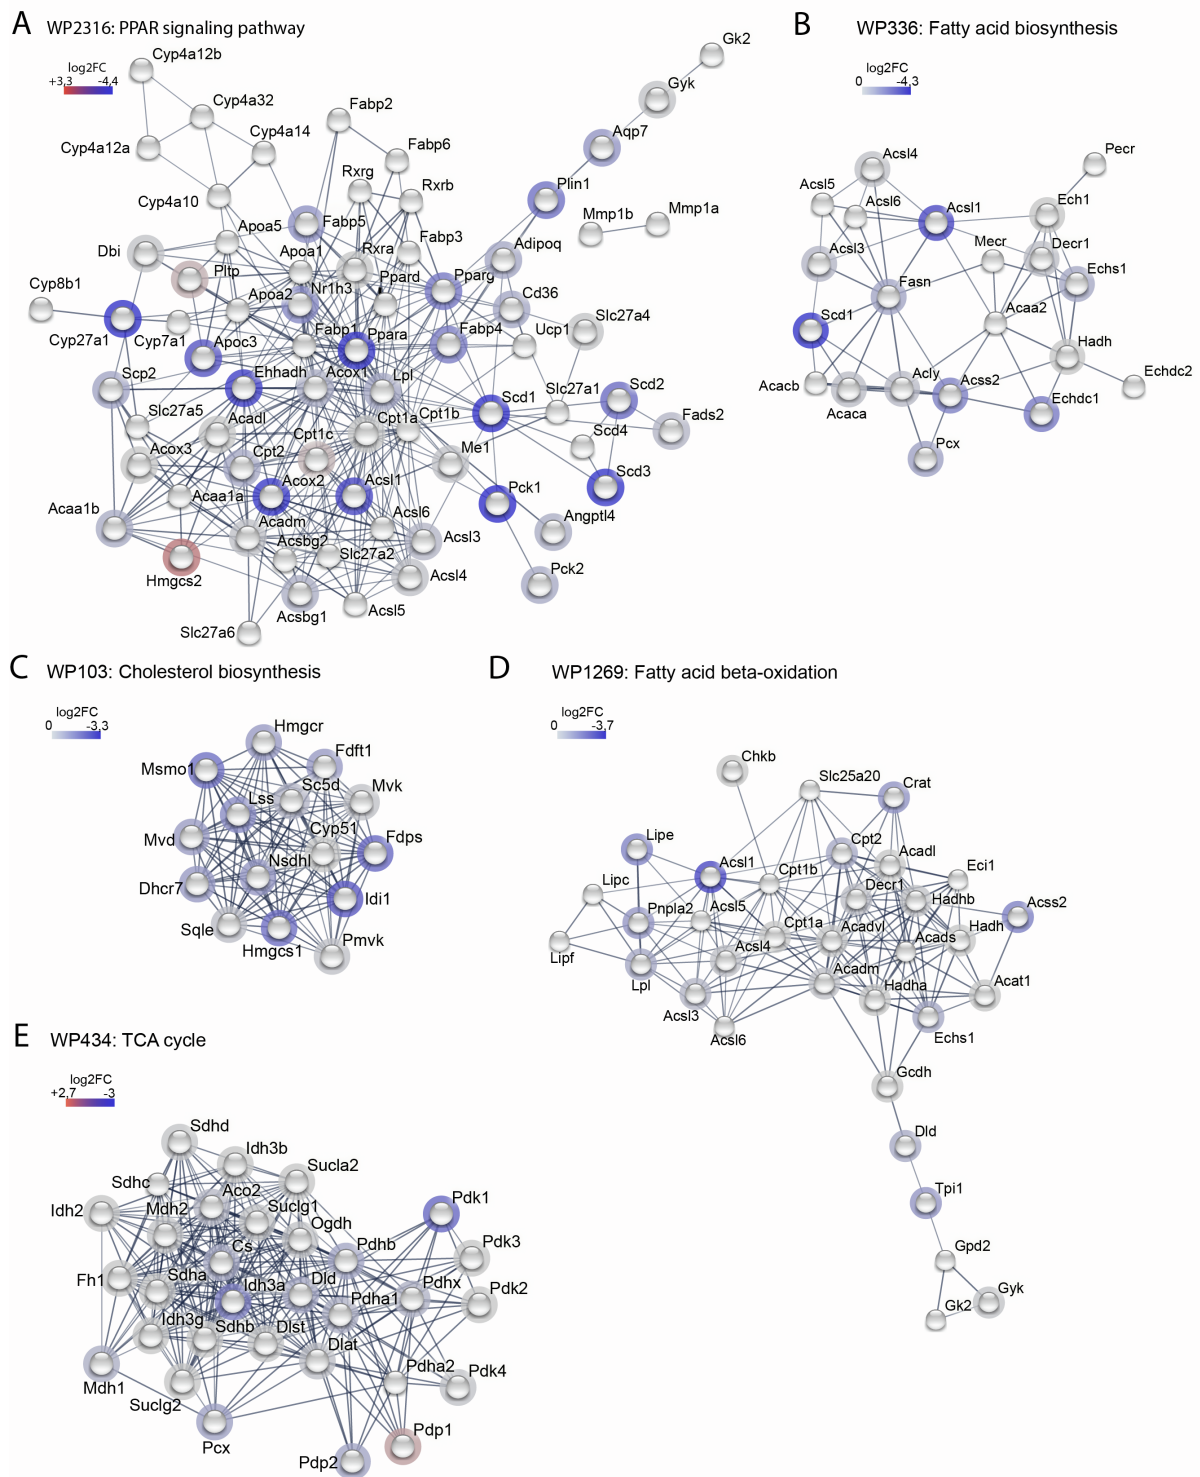

1

2 **Figure S10. Interaction networks in *Mkl1*-KO cells vs. CTL cells 7 days post-**  
 3 **differentiation, related to Figure 5.** All networks were generated using STRING-db protein  
 4 interaction network for WP2316: PPAR signaling pathway (**A**); WP336: Fatty acid biosynthesis  
 5 (**B**); WP103: Cholesterol biosynthesis (**C**); WP1269: Fatty acid beta-oxidation (**D**); WP434:  
 6 TCA cycle (**E**).

**A** WP2316: PPAR signaling pathway

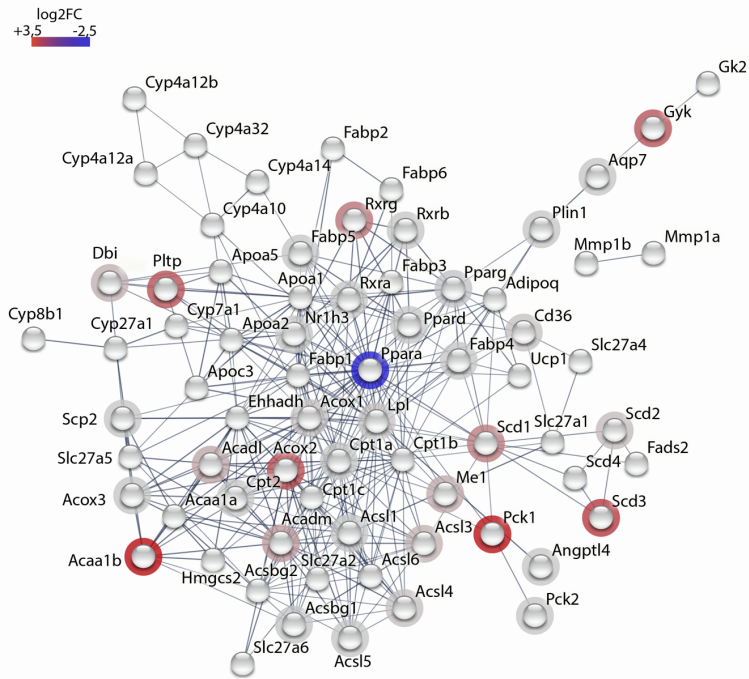

**B** WP295: Electron transport chain

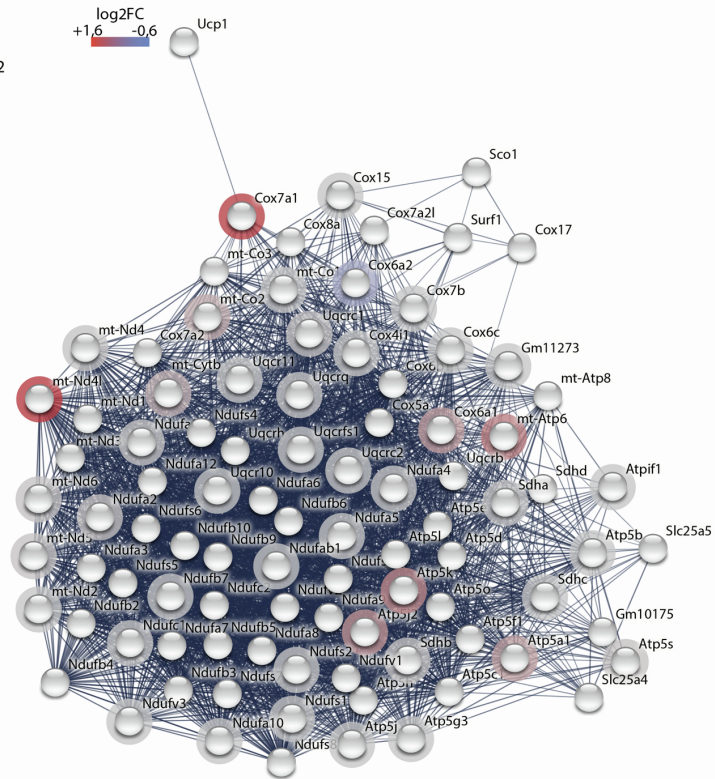

**C** WP434: TCA cycle

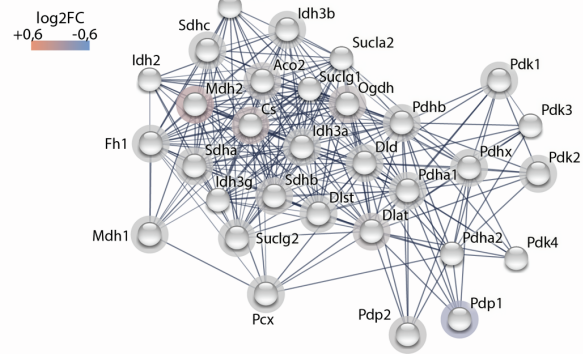

1 **Figure S11. Interaction networks in *Ripk3*-KO cells vs. CTL cells 7 days post-**  
2 **differentiation, related to Figure 5.** All networks were generated using STRING-db:  
3 WP2316: PPAR signaling pathway (**A**); WP295: Electron transport chain (**B**); WP434: TCA  
4 cycle (**C**).  
5

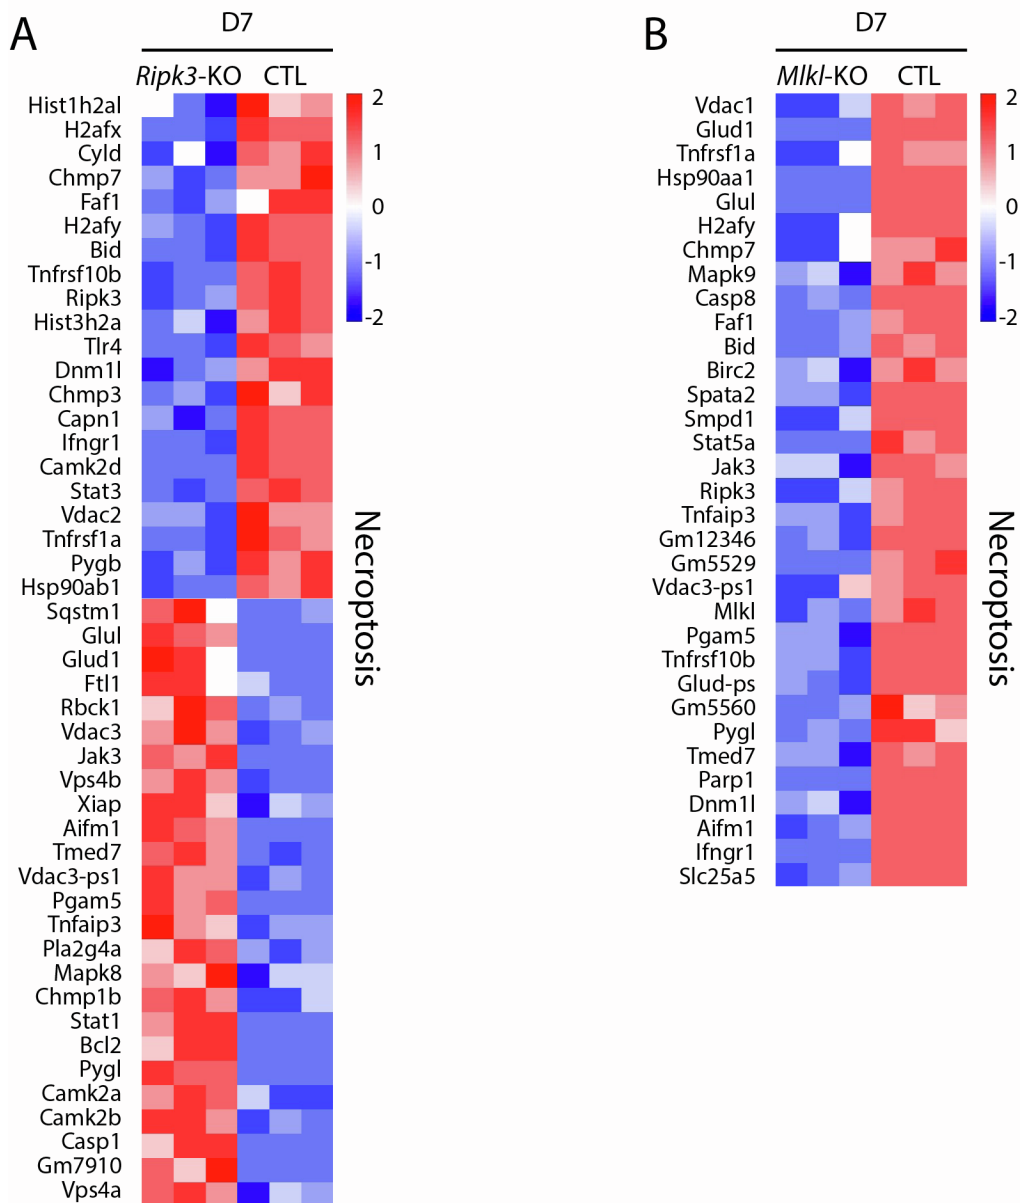

1  
2  
3  
4  
5  
6  
7  
8  
9

**Figure S12. Differentially expressed gene clustered for necroptosis pathway, related to Figure 5.** Hierarchical clustering heatmap of fragments per kilobase million (FPKM) values of differentially expressed genes in differentiated 3T3-L1 cells (Day 7) between CTL and *Ripk3*- (A) or *Mkl*- (B) deficient cells. Red represents high FPKM values and blue represents low FPKM values. Color descending from red to blue indicates log<sub>10</sub> (FPKM + 2) from high to low expression.

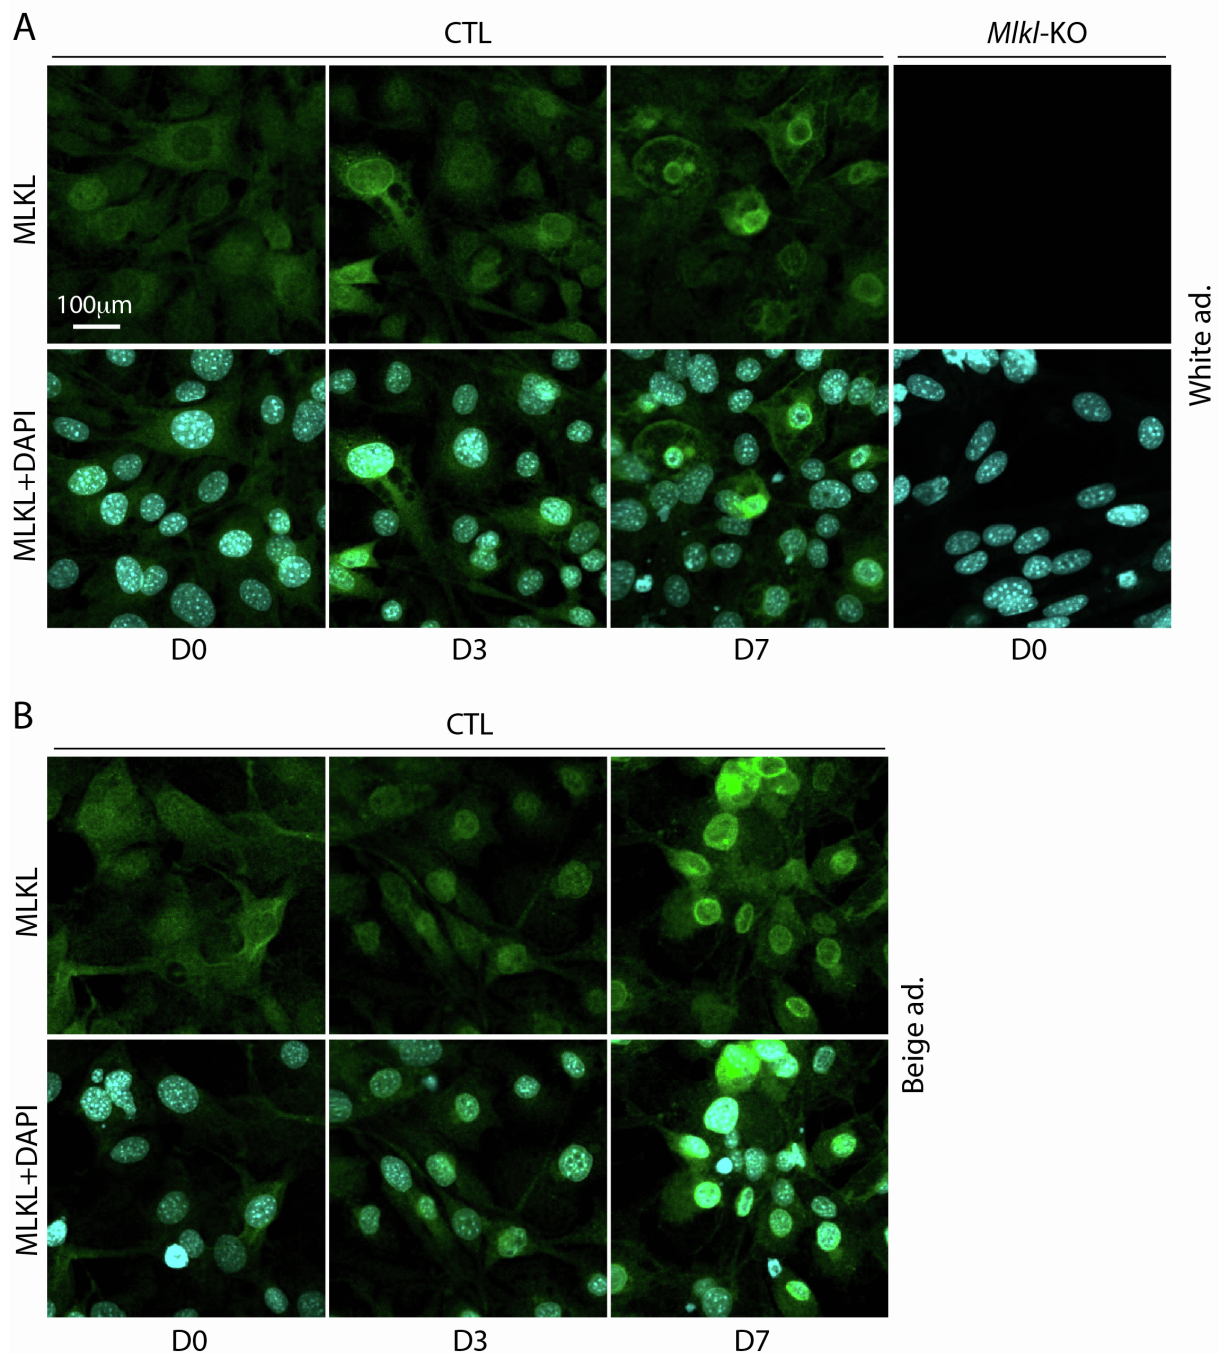

1  
2

3 **Figure S13. MLKL is located in both cytoplasm and nucleus in adipocytes, related to**  
 4 **Figure 4.** Confocal microscopy was used to detect endogenous MLKL in control (CTL) 3T3-  
 5 L1 cells by immunostaining with anti-MLKL antibody. *Mlkl*-KO cells were also stained as a  
 6 negative control. The nuclei were counterstained with DAPI. The 3T3-L1 cells were  
 7 differentiated into either white (A) or beige (B) adipocytes. D0-D7: Day 0 to Day 7.
